# Supplementary material for: Synergistically modified WS2@PANI binary nanocomposite-based all-solid-state symmetric supercapacitor with high energy density
Source: Royal Society of Chemistry journal article supplement (doi:10.1039/d2nj00165a), 2022-01-01
Supplement: d2nj00165a1.pdf [file d2nj00165a1.pdf]

**Supplementary information for:**

**Synergistically modified WS<sub>2</sub>@PANI binary nanocomposite based all-solid-state symmetric supercapacitor with high energy density**

Muzahir Iqbal, Nilesh G. Saykar, Prashant S. Alegaonkar\*, Santosh K. Mahapatra\*  
*Department of Physics, School of Basic Sciences, Central University of Punjab, Bathinda-151401, PB, INDIA*

---

\*Corresponding author: Santosh K. Mahapatra (email: [sk.mahapatra@cup.edu.in](mailto:sk.mahapatra@cup.edu.in))

\*Corresponding author: Prashant S. Alegaonkar (email: [prashant.alegaonkar@cup.edu.in](mailto:prashant.alegaonkar@cup.edu.in))

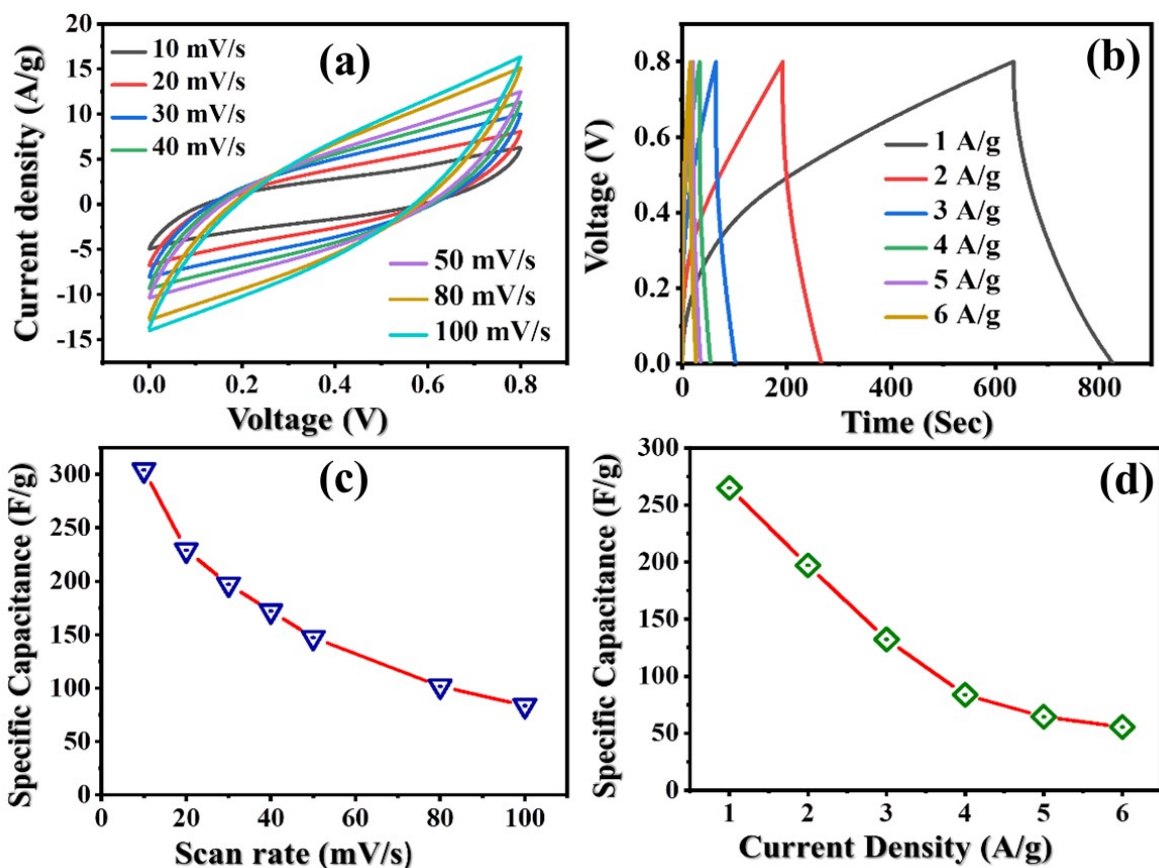

Fig.S1 (a) Recorded CV profiles over 10-100mV/s with positive voltage sweep from 0-8V and reduction in CSP by >10%, (b) GCD curves collected over 1-6A/g, (c) and (d) variation in specific capacitance with different scan rates and current density.

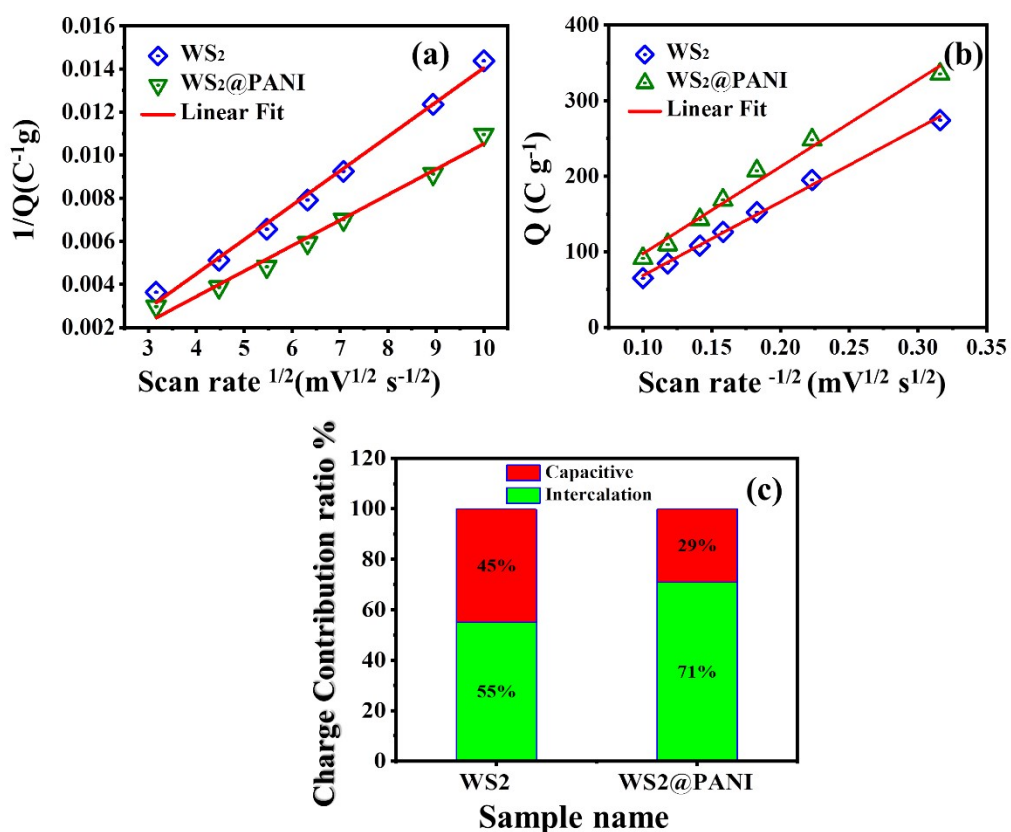

**Fig.S2.** (a)  $q^{-1}$  versus  $V^{1/2}$  (b) (c)  $q$  versus  $V^{-1/2}$  plots obtained from CV curve at different scan sweep. (c) charge contribution % due to capacitive and intercalation for  $WS_2$  and  $WS_2@PANI$
